# Supplementary material for: Rab6 Dependent Post-Golgi Trafficking of HSV1 Envelope Proteins to Sites of Virus Envelopment
Source: PubMed Central journal article supplement (PMC4345966; doi:10.1111/tra.12134), 2013-11-18
Supplement: tra0015-0157-SD1.pdf [file tra0015-0157-SD1.pdf]

| Target | Duplex 1 | Duplex 2 | Target   | Duplex 1 | Duplex 2 |
|--------|----------|----------|----------|----------|----------|
| RAB1A  | s229381  | s11658   | RAB23    | s28567   | s28568   |
| RAB1B  | s117     | s119     | RAB24    | s28803   | s28804   |
| RAB2A  | s11660   | s11661   | RAB25    | s32700   | s32701   |
| RAB2B  | s39689   | s39688   | RAB26    | s24590   | s24591   |
| RAB3A  | s11666   | s11667   | RAB27A   | s11693   | s11694   |
| RAB3B  | s11669   | s11671   | RAB27B   | s11696   | s11697   |
| RAB3C  | s41884   | s41885   | RAB28    | s17910   | s17911   |
| RAB3D  | s18326   | s18327   | RAB30    | s26136   | s26137   |
| RAB4A  | s11675   | s11676   | RAB31    | s21731   | s21732   |
| RAB4B  | s28800   | s28801   | RAB32    | s21618   | s21619   |
| RAB5A  | s11678   | s11679   | RAB33A   | s17907   | s17908   |
| RAB5B  | s11681   | s11682   | RAB33B   | s37937   | s37938   |
| RAB6A  | s11685   | s11686   | RAB34    | s38244   | s38245   |
| RAB6B  | s28326   | s28327   | RAB35    | s21707   | s21708   |
| RAB6C  | s38489   | s38490   | RAB36    | s18461   | s18462   |
| RAB7A  | s15442   | s15443   | RAB37    | s50262   | s50263   |
| RAB7B  | s50333   | s50334   | RAB38    | s24319   | s24320   |
| RAB8A  | s8679    | s8680    | RAB39    | s29359   | s29360   |
| RAB8B  | s28633   | s28634   | RAB39B   | s42008   | s42009   |
| RAB9A  | s17916   | s17917   | RAB40A   | s44480   | s44481   |
| RAB9B  | s27691   | s27692   | RAB40B   | s21588   | s21589   |
| RAB10  | s21390   | s21391   | RAB40C   | s33729   | s33730   |
| RAB11A | s16702   | s16703   | RAB41    | s51268   | s51269   |
| RAB11B | s17647   | s17648   | RAB42    | s41781   | s41782   |
| RAB12  | s47368   | s47369   | RAB43    | s50452   | s50453   |
| RAB13  | s11690   | s11691   |          |          |          |
| RAB14  | s28311   | s28312   | NMHCIIA  | s223     | s224     |
| RAB15  | s51761   | s51762   | NMHCIIIB | s9171    | s9169    |
| RAB17  | s34608   | s34609   | BICD1    | s1982    | s1983    |
| RAB18  | s22704   | s22703   | BICD2    | s23499   | s23497   |
| RAB19  | s53588   | s53589   | KIF5B    | s223974  | s223975  |
| RAB20  | s31158   | s31159   | DCTN1    | s52326   | s3973    |
| RAB21  | s22823   | s22824   | ERC1     | s22995   | s22996   |
| RAB22A | s32992   | s32993   | KIF20A   | s19676   | s19677   |

**Table S1**
