# Supplementary material for: Rab6 Dependent Post-Golgi Trafficking of HSV1 Envelope Proteins to Sites of Virus Envelopment
Source: PubMed Central journal article supplement (PMC4345966; doi:10.1111/tra.12134), 2013-11-18
Supplement: tra0015-0157-SD5.pdf [file tra0015-0157-SD5.pdf]

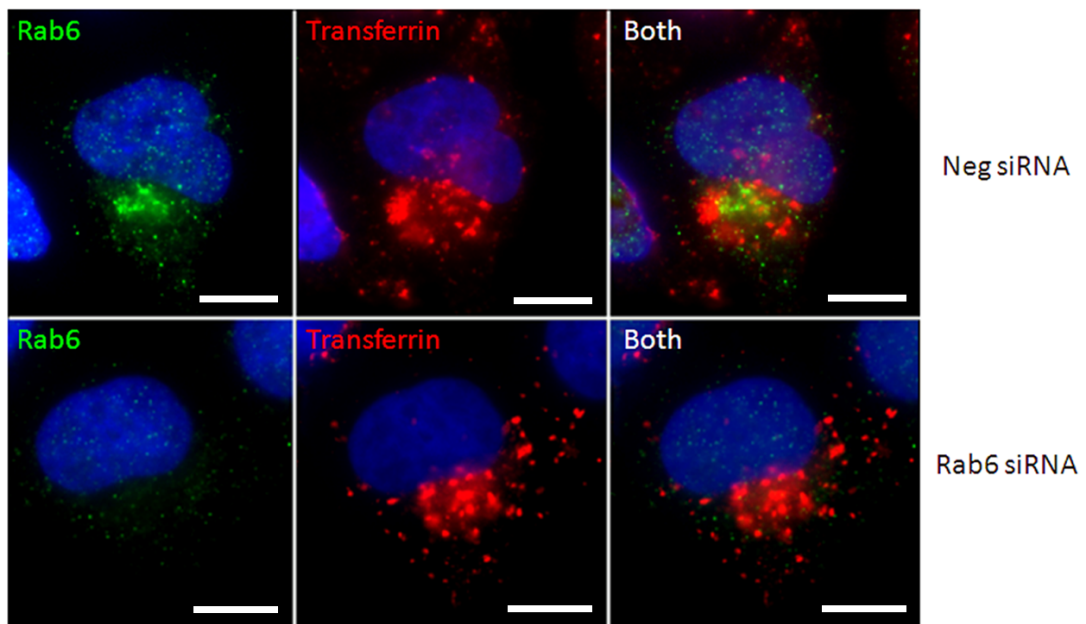

Figure S4
